# Supplementary material for: Effects of Bariatric Endoscopy on Non-Alcoholic Fatty Liver Disease: A Comprehensive Systematic Review and Meta-Analysis
Source: PubMed Central journal article supplement (PMC9247213; doi:10.3389/fendo.2022.931519), 2022-06-17
Supplement: Image_1.pdf [file Image_1.pdf]

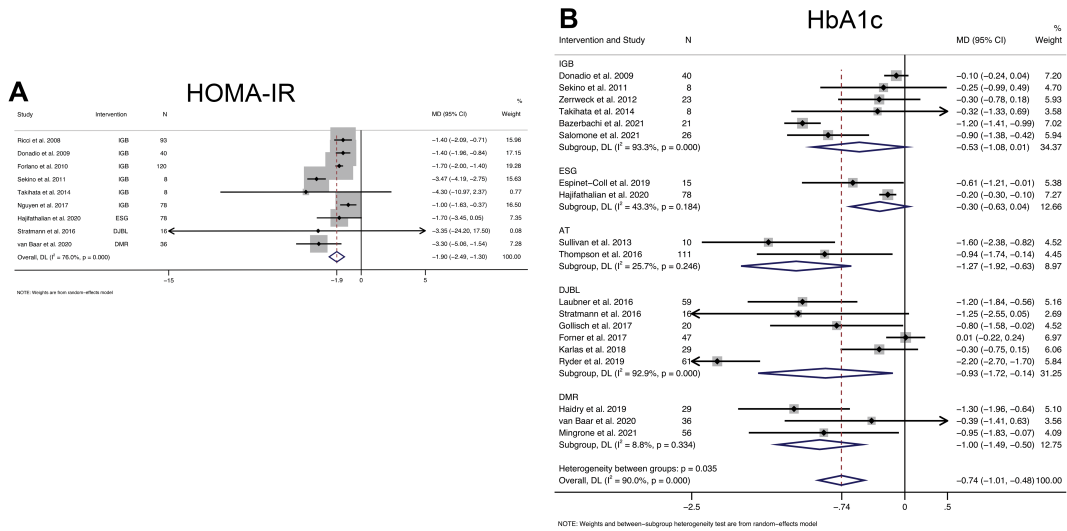

**Supplementary Figure 1.** Forest plot of changes in (A) Homeostasis Model Assessment of Insulin Resistance (HOMA-IR) and (B) glycated hemoglobin A1c (HbA1c) following bariatric and metabolic endoscopy.
