# Supplementary material for: Effects of Bariatric Endoscopy on Non-Alcoholic Fatty Liver Disease: A Comprehensive Systematic Review and Meta-Analysis
Source: PubMed Central journal article supplement (PMC9247213; doi:10.3389/fendo.2022.931519), 2022-06-17
Supplement: Image_2.pdf [file Image_2.pdf]

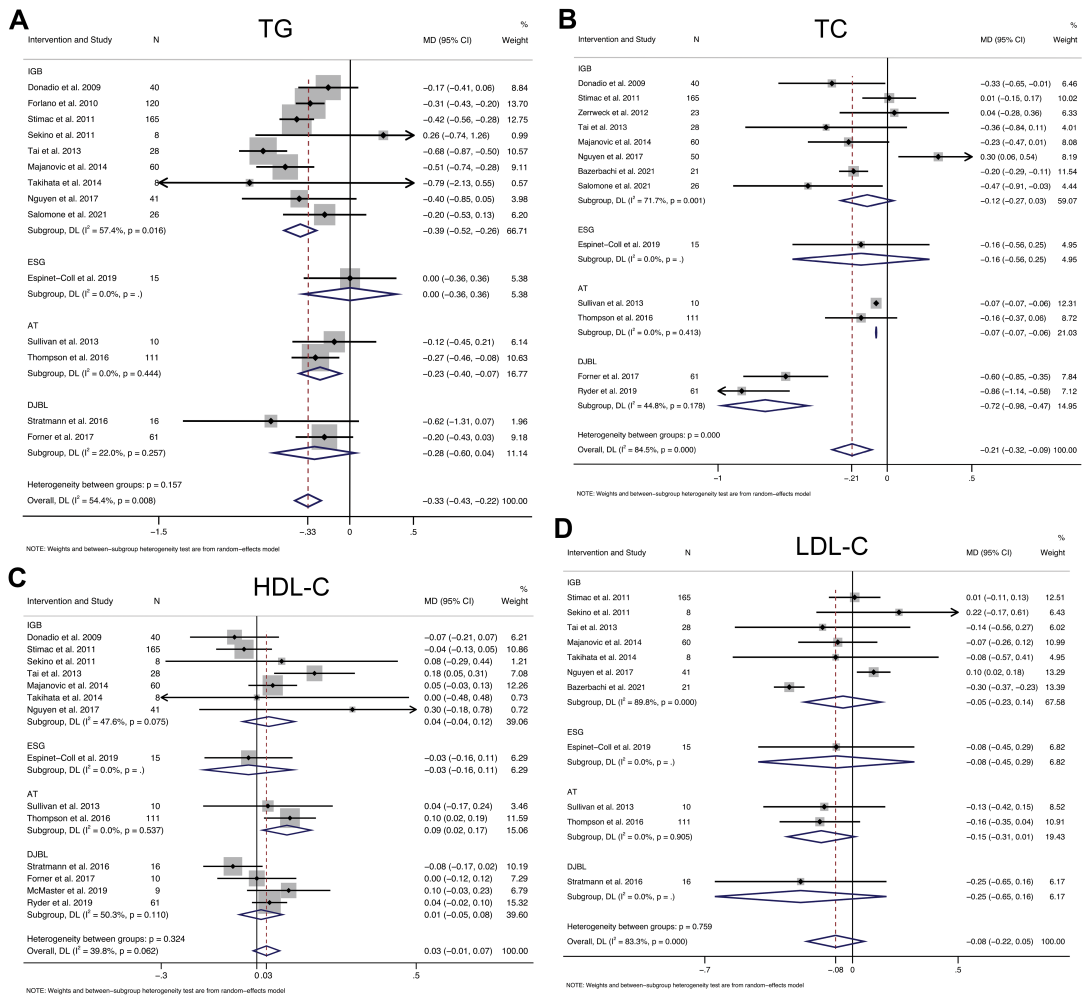

**Supplementary Figure 2.** Forest plot of change in lipid profiles following bariatric and metabolic endoscopy. (A) serum triglycerides (TG), (B) serum total cholesterol (TC), (C) serum high-density lipoprotein-cholesterol (HDL-C), (D) serum low-density lipoprotein-cholesterol (LDL-C).
