# Supplementary material for: Effects of Bariatric Endoscopy on Non-Alcoholic Fatty Liver Disease: A Comprehensive Systematic Review and Meta-Analysis
Source: PubMed Central journal article supplement (PMC9247213; doi:10.3389/fendo.2022.931519), 2022-06-17
Supplement: Image_3.pdf [file Image_3.pdf]

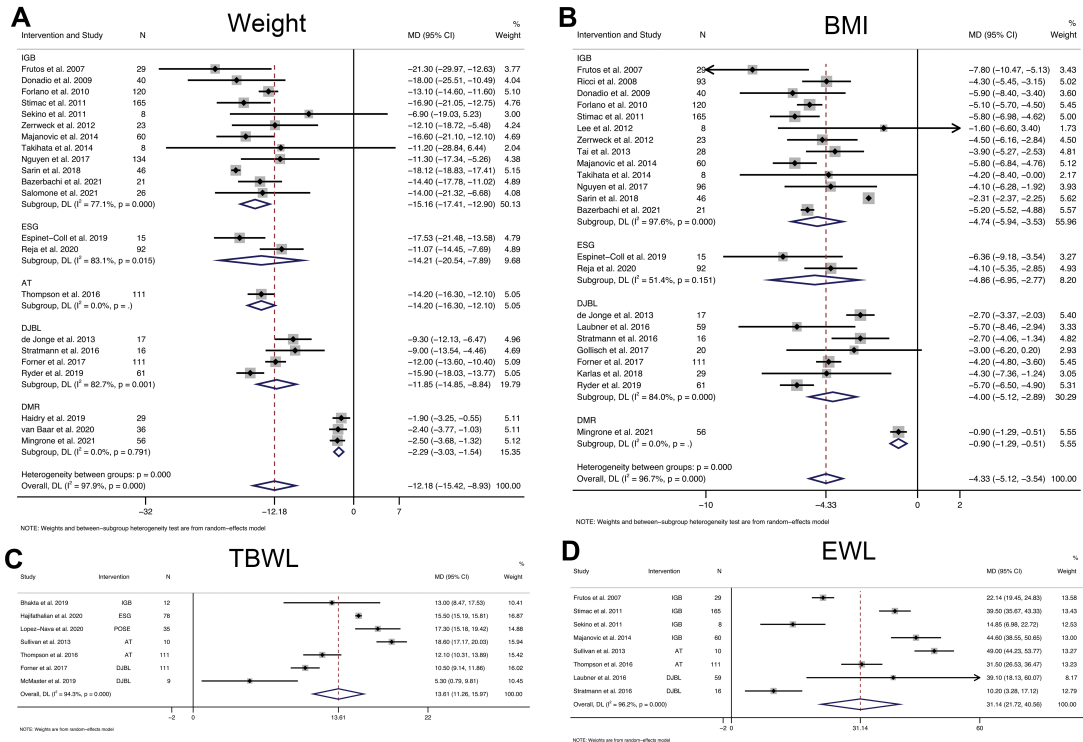

**Supplementary Figure 3.** Forest plot of weight loss following bariatric and metabolic endoscopy. (A) body weight, (B) body mass index (BMI), (C) total body weight loss (TBWL), (D) excess weight loss (EWL).
